# Supplementary material
Source: MDPI journal article supplement (https://www.mdpi.com/2673-4095/5/2/25)
Supplement: s1 [file s1]

# Supplementary Materials: Technology Readiness Level of Robotic Technology and Artificial Intelligence in Dentistry: A Comprehensive Review

Leonardo Mohamad Nassani, Kanza Javed, Ming Hong Jim Pun, Rafat Samih Amer, Ahmed Z. Abdelkarim and Gustavo Vicentis Oliveira Fernandes

Table S1. Search Strategy per Database.

| PubMed Search Strategy   |                                                                                                                                                                                                                                                                                              |
|--------------------------|----------------------------------------------------------------------------------------------------------------------------------------------------------------------------------------------------------------------------------------------------------------------------------------------|
| #1                       | Dental Robotic Surgical Procedures[MeSH] OR Dental[MeSH] OR Health Education, dentistry[tiab] OR Endodontic [tiab] OR Implantology[tiab] OR Orthodontic[tiab] OR Dentistry/surgery[MeSH] dent* AND robot*OR artificial intelligence OR machine learning<br>dent* AND artificial intelligence |
| #2                       | "dental implants" [MeSH] OR "dental radiology" OR "dental orthodontics" OR "dental prostheses, implant-supported" [MeSH] or "Dental implant, single tooth" [MeSH]) AND ("Artificial intelligence"                                                                                            |
| #3                       | [MeSH] OR "Computational Intelligence"OR "Machine Intelligence" OR "AI-based" OR "Machine                                                                                                                                                                                                    |
| #4                       | learning" [MeSH] OR "Deep learning" [MeSH] OR "Supervised machine learning" [MeSH] OR "Unsupervised Machine Learning" [MeSH] OR "Neural Networks, Computer" [MeSH]                                                                                                                           |
| PubMed                   | "Dental Robotic Surgical Procedures" OR Dental OR "Health Education" OR Endodontic OR Implantology OR Orthodontic OR Dentistry OR Surgery<br>OR "dental implants" OR "dental radiology" OR "dental orthodontics" OR "dental prostheses" OR implant-supported" OR "Dental implant"            |
| Google Scholar, and IEEE | AND "artificial intelligence" OR "machine learning" OR "Computational Intelligence" OR "Machine Intelligence" OR "AI-based" OR "Deep learning" OR "Supervised machine learning" OR "Unsupervised Machine Learning" OR "Neural Networks"                                                      |
